# Supplementary material for: Phased Assembly of Neo-Sex Chromosomes Reveals Extensive Y Degeneration and Rapid Genome Evolution in Rumex hastatulus
Source: PubMed Central journal article supplement (PMC11057207; doi:10.1093/molbev/msae074), 2024-04-12
Supplement: msae074_supplementary_data.pdf [file msae074_supplementary_data.pdf]

# Supplementary Material

## Phased assembly of neo-sex chromosomes reveals extensive Y degeneration and rapid genome evolution in *Rumex hastatulus*

Bianca Sacchi<sup>1\*</sup>, Zoë Humphries<sup>1\*</sup>, Jana Kružlicová<sup>2</sup>, Markéta BodlÁková<sup>2</sup>, Cassandre Pyne<sup>1</sup>, Baharul Choudhury<sup>1,3</sup>, Yunchen Gong<sup>4</sup>, VÁclav BačovskÝ<sup>2</sup>, Roman Hobza<sup>2</sup>, Spencer C.H. Barrett<sup>1</sup>, and Stephen I. Wright<sup>1,4</sup>

Table S1- Genome Assembly Statistics

| Assembly                         | Total Assembly Length | Contig N50 | Contig L50 | Contig number | Scaffold N50 | Scaffold L50 | Scaffold N90 | Scaffold L90 |
|----------------------------------|-----------------------|------------|------------|---------------|--------------|--------------|--------------|--------------|
| <i>R. salicifolius</i>           | 586,431,610           | 53,106,915 | 5          | 19            | 56,809,946   | 5            | 51,010,208   | 9            |
| <i>R. hastatulus</i> haplotype A | 1,510,206,782         | 6,283,184  | 73         | 361           | 466,657,150  | 2            | 168,693,024  | 4            |
| <i>R. hastatulus</i> haplotype B | 1,719,830,090         | 5,620,551  | 92         | 468           | 343,398,141  | 3            | 166,046,2686 | 5            |

Table S2 - BUSCO results

| Genome                                    | OrthoDB     | Complete, single copy | Complete, duplicated | Fragmented | Missing   |
|-------------------------------------------|-------------|-----------------------|----------------------|------------|-----------|
| <i>R. salicifolius</i> assembly           | Eukaryota   | 227 (89%)             | 27 (10.6%)           | 0          | 1 (0.4%)  |
| <i>R. hastatulus</i> haplotype A assembly | Eukaryota   | 223 (87.5%)           | 30 (11.8%)           | 0          | 2 (0.7%)  |
| <i>R. hastatulus</i> haplotype B assembly | Eukaryota   | 224 (87.8%)           | 30 (11.8%)           | 0          | 1 (0.4%)  |
| <i>R. salicifolius</i> assembly           | Embryophyta | 1528 (94.7%)          | 39 (2.4%)            | 20 (1.2%)  | 27 (1.7%) |
| <i>R. hastatulus</i> haplotype A assembly | Embryophyta | 1476 (91.4%)          | 77 (4.8%)            | 20 (1.2%)  | 41 (2.6%) |
| <i>R. hastatulus</i> haplotype B assembly | Embryophyta | 1463 (90.6%)          | 71 (4.4%)            | 26 (1.6%)  | 54 (3.4%) |

|                                                   |             |              |            |           |             |
|---------------------------------------------------|-------------|--------------|------------|-----------|-------------|
| <i>R. salicifolius</i><br>annotation              | Eukaryota   | 211 (82.7%)  | 27 (10.6%) | 10 (3.9%) | 7 (2.8%)    |
| <i>R. hastatulus</i><br>haplotype A<br>annotation | Eukaryota   | 200 (78.4%)  | 23 (9.0%)  | 16 (6.3%) | 16 (6.3%)   |
| <i>R. hastatulus</i><br>haplotype B<br>annotation | Eukaryota   | 211 (82.7%)  | 25 (9.8%)  | 6 (2.4%)  | 13 (5.1%)   |
| <i>R. salicifolius</i><br>annotation              | Embryophyta | 1379 (85.4%) | 44 (2.7%)  | 47 (2.9%) | 144 (9.0%)  |
| <i>R. hastatulus</i><br>haplotype A<br>annotation | Embryophyta | 1312 (81.3%) | 57 (3.5%)  | 81 (5.0%) | 164 (10.2%) |
| <i>R. hastatulus</i><br>haplotype B<br>annotation | Embryophyta | 1331 (82.5%) | 50 (3.1%)  | 58 (3.6%) | 175 (10.8%) |

Table S3 – Non-syntenic orthologs

| Region                   | Number of non-syntenic orthologs unique to haplotype A <sup>1</sup> | Number of non-syntenic orthologs unique to haplotype B <sup>2</sup> |
|--------------------------|---------------------------------------------------------------------|---------------------------------------------------------------------|
| A1                       | 14                                                                  | 22                                                                  |
| A2                       | 11                                                                  | 34                                                                  |
| A4                       | 6                                                                   | 6                                                                   |
| New sex-linked region    | 1                                                                   | 6                                                                   |
| Old sex-linked region    | 13                                                                  | 155                                                                 |
| Pseudo-autosomal regions | 2                                                                   | 15                                                                  |

1. Non-syntenic orthologs unique to haplotype A (X-bearing) are syntenic between haplotype B (Y-bearing) and *R. salicifolius* only.
2. Non-syntenic orthologs unique to haplotype B are syntenic between *R. salicifolius* and haplotype A only.

Table S4 - TE count chi-square

| Region   | Linkage | <i>p-value</i> | Expected | X observed | Y observed | Y/X ratio |
|----------|---------|----------------|----------|------------|------------|-----------|
| entire   | New     | 1.332333e-71   | 88431.5  | 92194      | 84669      | 0.9183786 |
| entire   | Old     | 0.00000e+00    | 299641.5 | 158443     | 440840     | 2.7823255 |
| entire   | PAR     | 2.220696e-11   | 160351.5 | 158457     | 162246     | 1.0239118 |
| upstream | New     | 8.139606e-02   | 951.0    | 913        | 989        | 1.0832421 |

|            |     |              |        |      |      |           |
|------------|-----|--------------|--------|------|------|-----------|
| upstream   | Old | 5.521570e-27 | 1608.0 | 1303 | 1913 | 1.4681504 |
| upstream   | PAR | 1.598126e-05 | 5035.5 | 4819 | 5252 | 1.0898527 |
| downstream | New | 5.394717e-06 | 1015.5 | 913  | 1118 | 1.2245345 |
| downstream | Old | 2.074799e-41 | 1774.5 | 1373 | 2176 | 1.5848507 |
| downstream | PAR | 2.162392e-16 | 5045.5 | 4633 | 5458 | 1.1780704 |
| exon       | New | 3.411261e-01 | 565.0  | 549  | 581  | 1.0582878 |
| exon       | Old | 5.152438e-19 | 1154.0 | 940  | 1368 | 1.4553191 |
| exon       | PAR | 2.187631e-20 | 1703.0 | 1973 | 1433 | 0.7263051 |
| intron     | New | 2.398108e-02 | 812.5  | 767  | 858  | 1.1186441 |
| intron     | Old | 1.104104e-19 | 1334.5 | 1100 | 1569 | 1.4263636 |
| intron     | PAR | 6.717053e-01 | 4454.0 | 4474 | 4434 | 0.9910595 |

Table S5 – XYY male haplotype B gene loss results

| Region | Number of genes with syntenic orthologs in outgroup <sup>1</sup> | Proportion of genes completely absent in haplotype B <sup>2</sup> | Proportion of genes partially absent in haplotype B <sup>3</sup> |
|--------|------------------------------------------------------------------|-------------------------------------------------------------------|------------------------------------------------------------------|
| A1     | 2786                                                             | 0.0004                                                            | 0.0262                                                           |
| A2     | 2833                                                             | 0.0039                                                            | 0.0289                                                           |
| A4     | 1535                                                             | 0.0033                                                            | 0.0319                                                           |
| New X  | 252                                                              | 0.0000                                                            | 0.0278                                                           |
| Old X  | 745                                                              | 0.2107                                                            | 0.1275                                                           |
| PAR1   | 793                                                              | 0.0076                                                            | 0.0303                                                           |
| PAR2   | 1295                                                             | 0.0015                                                            | 0.0409                                                           |

1. Total number of genes in haplotype A sharing a syntenic ortholog with the outgroup *R. salicifolius*, with or without orthologs in haplotype B.
2. Proportion of haplotype A genes that are not orthologous haplotype B genes and do not return any BLAST hits when aligned to the haplotype B genome assembly.
3. Proportion of genes with partial BLAST hits.

Table S6 – XYY male haplotype A gene loss results

| Region | Number of genes with syntenic orthologs in outgroup <sup>1</sup> | Proportion of genes absent in maternal haplotype <sup>2</sup> |
|--------|------------------------------------------------------------------|---------------------------------------------------------------|
| A1     | 2702                                                             | 0.0248                                                        |
| A2     | 2714                                                             | 0.0247                                                        |
| A4     | 1451                                                             | 0.0207                                                        |
| NewY1  | 145                                                              | 0.0069                                                        |
| NewY2  | 96                                                               | 0.0208                                                        |
| OldY1  | 206                                                              | 0.0146                                                        |
| OldY2  | 280                                                              | 0.0250                                                        |

|      |      |        |
|------|------|--------|
| PAR1 | 755  | 0.0265 |
| PAR2 | 1236 | 0.0218 |

1. Total number of genes in haplotype B sharing a syntenic ortholog with the outgroup *R. salicifolius*
2. Proportion of genes in 1 that do not share orthology with haplotype A

Table S7. The list of used primers of candidate satellites

| Primer            | Sequence (5'-3')          | Product size | Annealing temperature (°C) |
|-------------------|---------------------------|--------------|----------------------------|
| <b>CI12F</b>      | AGTTCGTTGTCCAATATACTCGTT  | 117          | 58                         |
| <b>CI12R</b>      | TGTGAAAACGTACCGAACATGT    |              |                            |
| <b>CI133 F</b>    | GTATAAAAACCGTAACCGTG      | 66           | 53                         |
| <b>CI133 R</b>    | GCTCGAAATAGTGTAATCAAAC    |              |                            |
| <b>CI134 5S F</b> | CCACTGATATATTGACCGCTCGA   | 265          | 60                         |
| <b>CI134 5S R</b> | AAAGGCAATATCTCATCCGATAGT  |              |                            |
| <b>CI135 F</b>    | CAATTTTCATGACGGTTAATAACG  | 1136         | 55                         |
| <b>CI135 R</b>    | CACGGTTACGGTTTTTATAC      |              |                            |
| <b>CI162F</b>     | GCTCAAAATTTTGTTGCTCTCC    | 80           | 60                         |
| <b>CI162R</b>     | TGGTGACTTAAAACATCAGAGCAAC |              |                            |
| <b>CI168 F</b>    | TGTACAATGGTAGAAATCGGGTC   | 170          | 55                         |
| <b>CI168 R</b>    | CAAATTTTGTTCAATCTC        |              |                            |
| <b>CI86 F</b>     | CACCTTGCCCGATGGAAACGGC    | 170          | 55                         |
| <b>CI86 R</b>     | CCTTGTTTCATCCGTTTCCGGTG   |              |                            |

Table S8. The composition of the hybridization mixture used in FISH

| Hybridization mixture | Volume per one slide (µl) |
|-----------------------|---------------------------|
| <b>Stringency 87%</b> |                           |
| 100% formamide        | 10                        |
| 50% dextran sulphate  | 4                         |
| 20xSSC                | 0.5                       |
| ddH <sub>2</sub> O    | X (to final volume)       |
| DNA probe             | 1 (for each cluster)      |
| Final volume 20 ml    |                           |

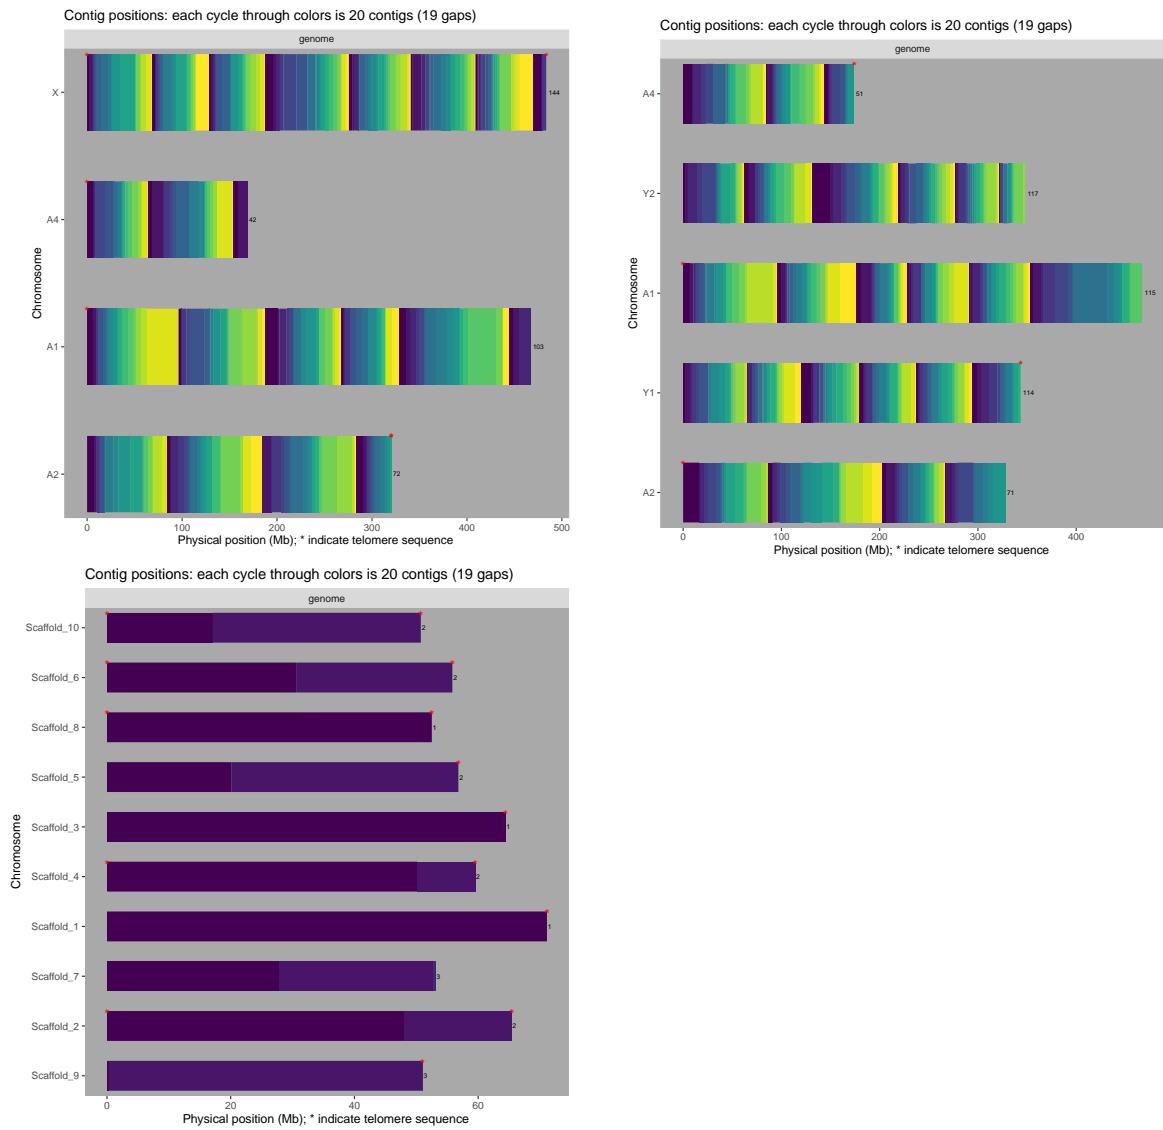

**Figure S1.** Contig size in *Rumex hastatulus* XY, Haplotype A, haplotype B, and *R. salicifolius* genome assemblies. Stars correspond to locations of telomere array sequence.

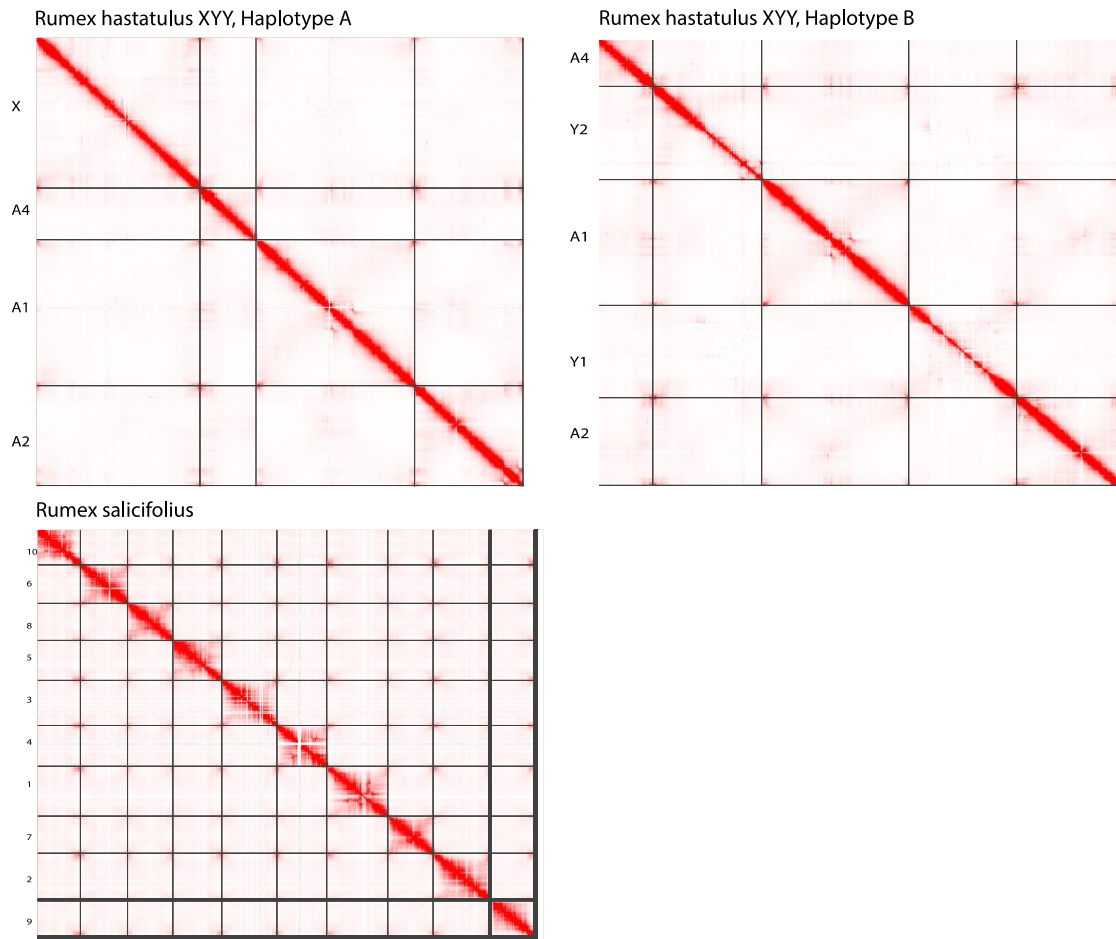

**Figure S2.**

Omni-C contact maps for phased assemblies of *Rumex hastatulus* and the assembly of *R. salicifolius*

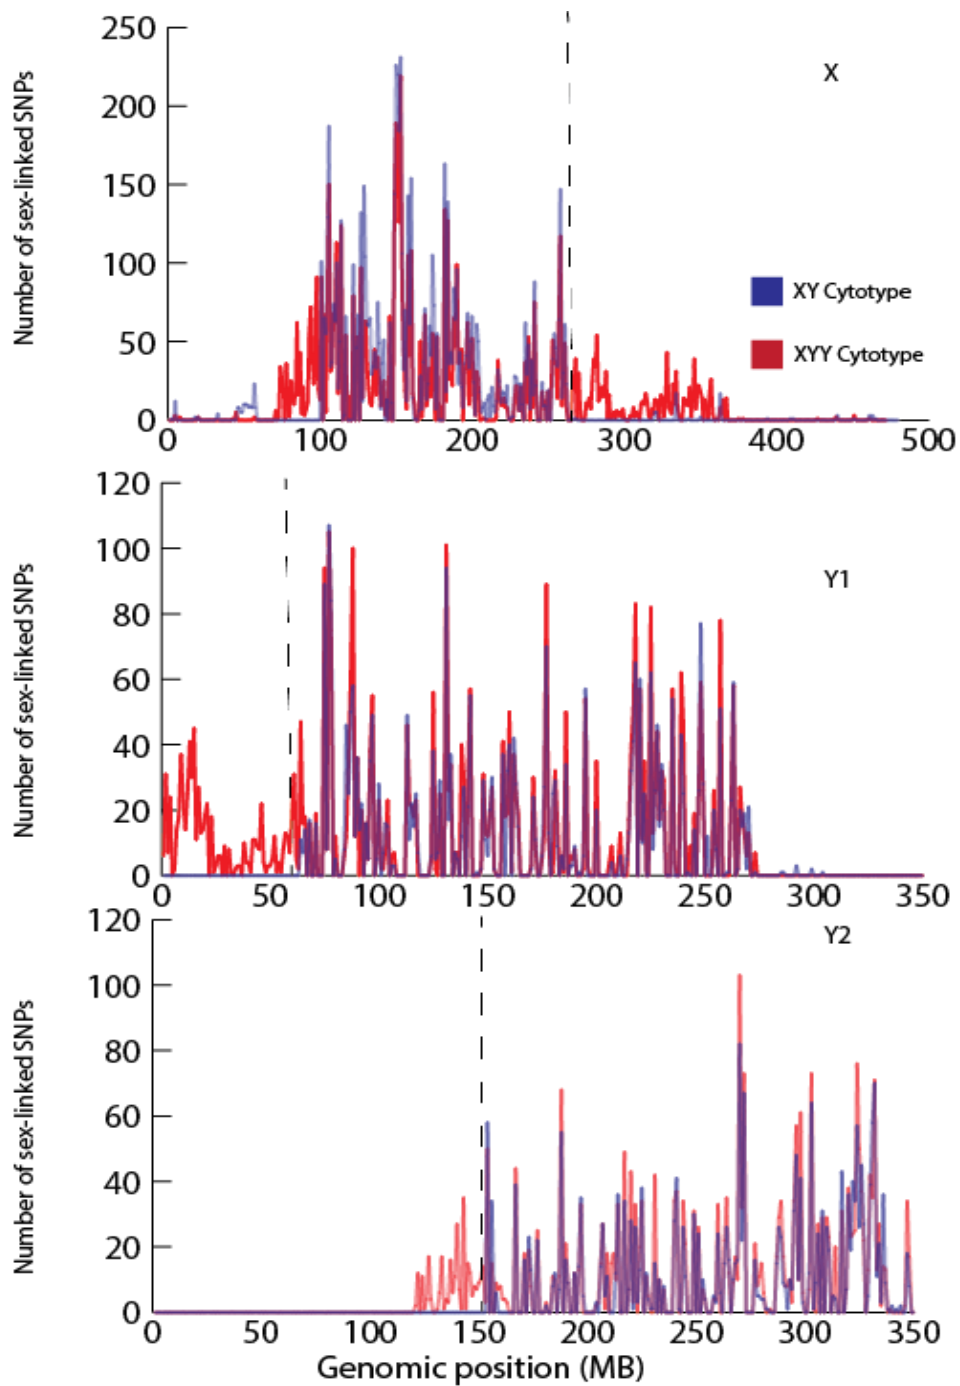

**Figure S3.** Sex-linked SNP patterns along the XYY cytotype's X, Y1 and Y2 chromosomes. Density of sex-linked SNPs in 1 MB windows in the XY and XYY cytotypes. Dashed line indicates the inferred breakpoint between the old X (Y) chromosome and the neo-X (neo-Y) region.

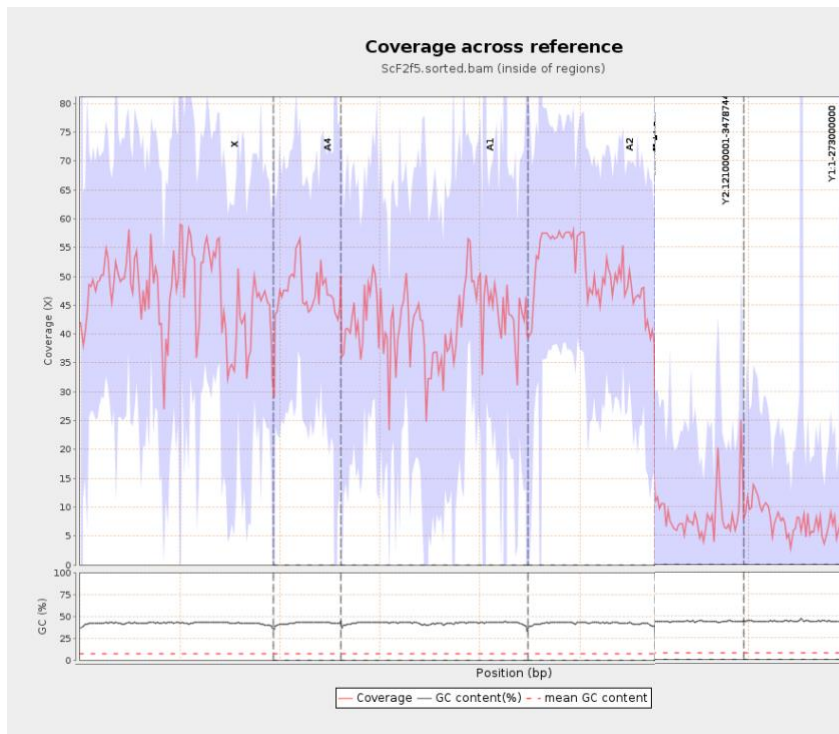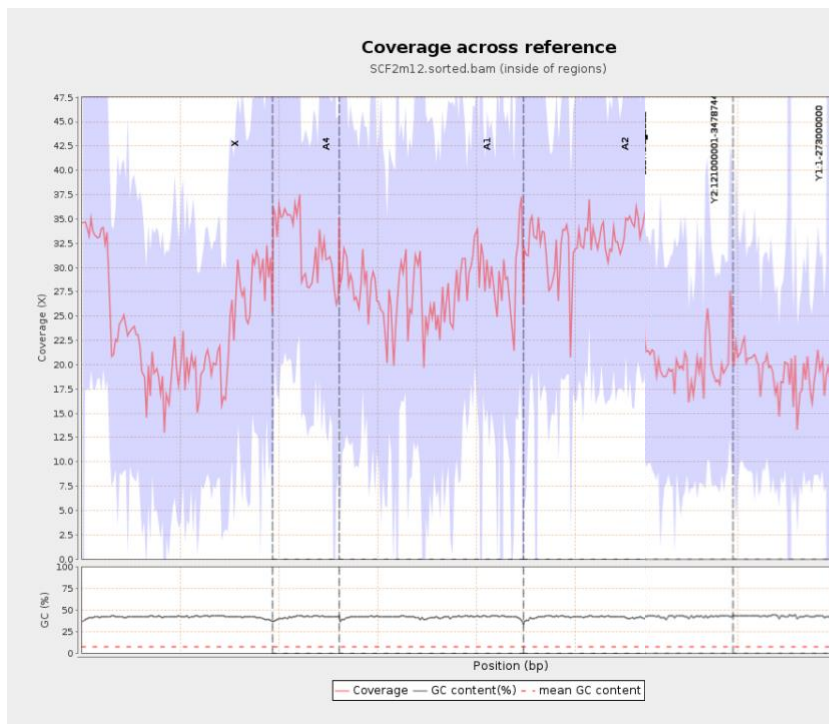

**Figure S4.** Depth of genomic reads from a female (top panel) male (bottom panel) XYY individual aligned to reference containing X, Y1, Y2 and autosomes. The high coverage regions on either end of the X in the male coverage plot corresponds to the pseudoautosomal regions. Mean and standard deviation of coverage is plotted in 400 windows across the genome. Small unassembled scaffolds have been removed from the plot.



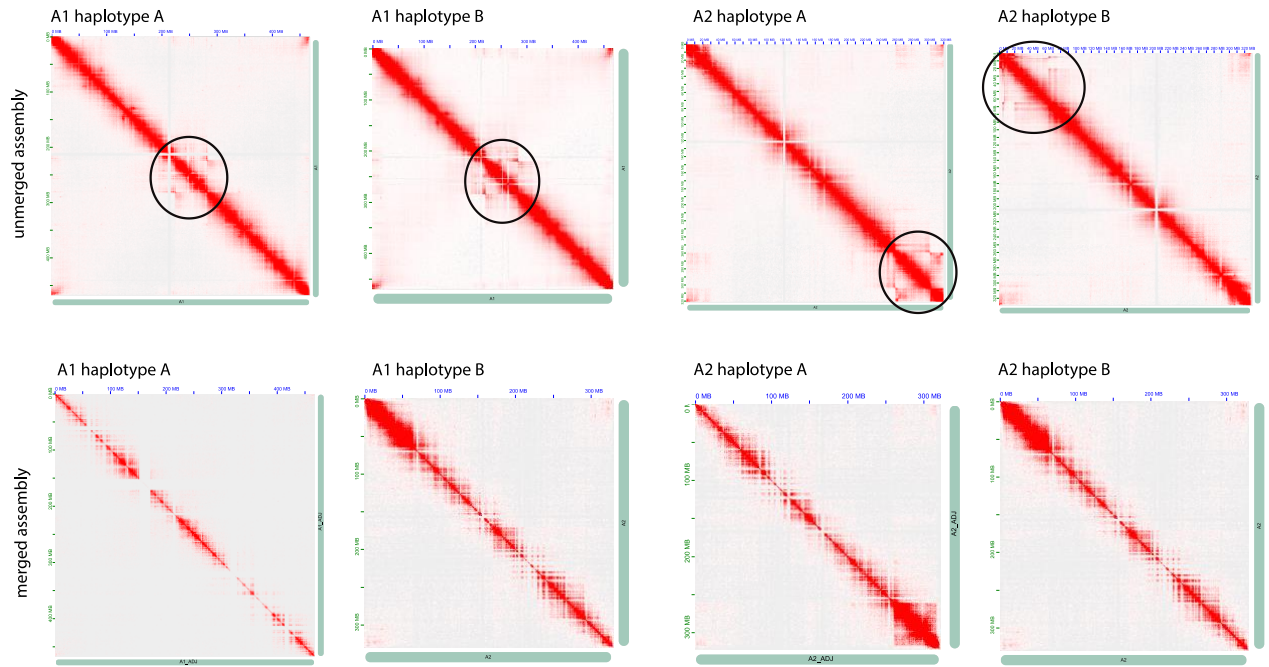

**Figure S5.**

OmniC contact maps for putative inverted regions. Top row shows OmniC maps for individual haplotype assemblies. The inverted regions are circled. Bottom row shows contact maps for combined reference including both haplotypes.



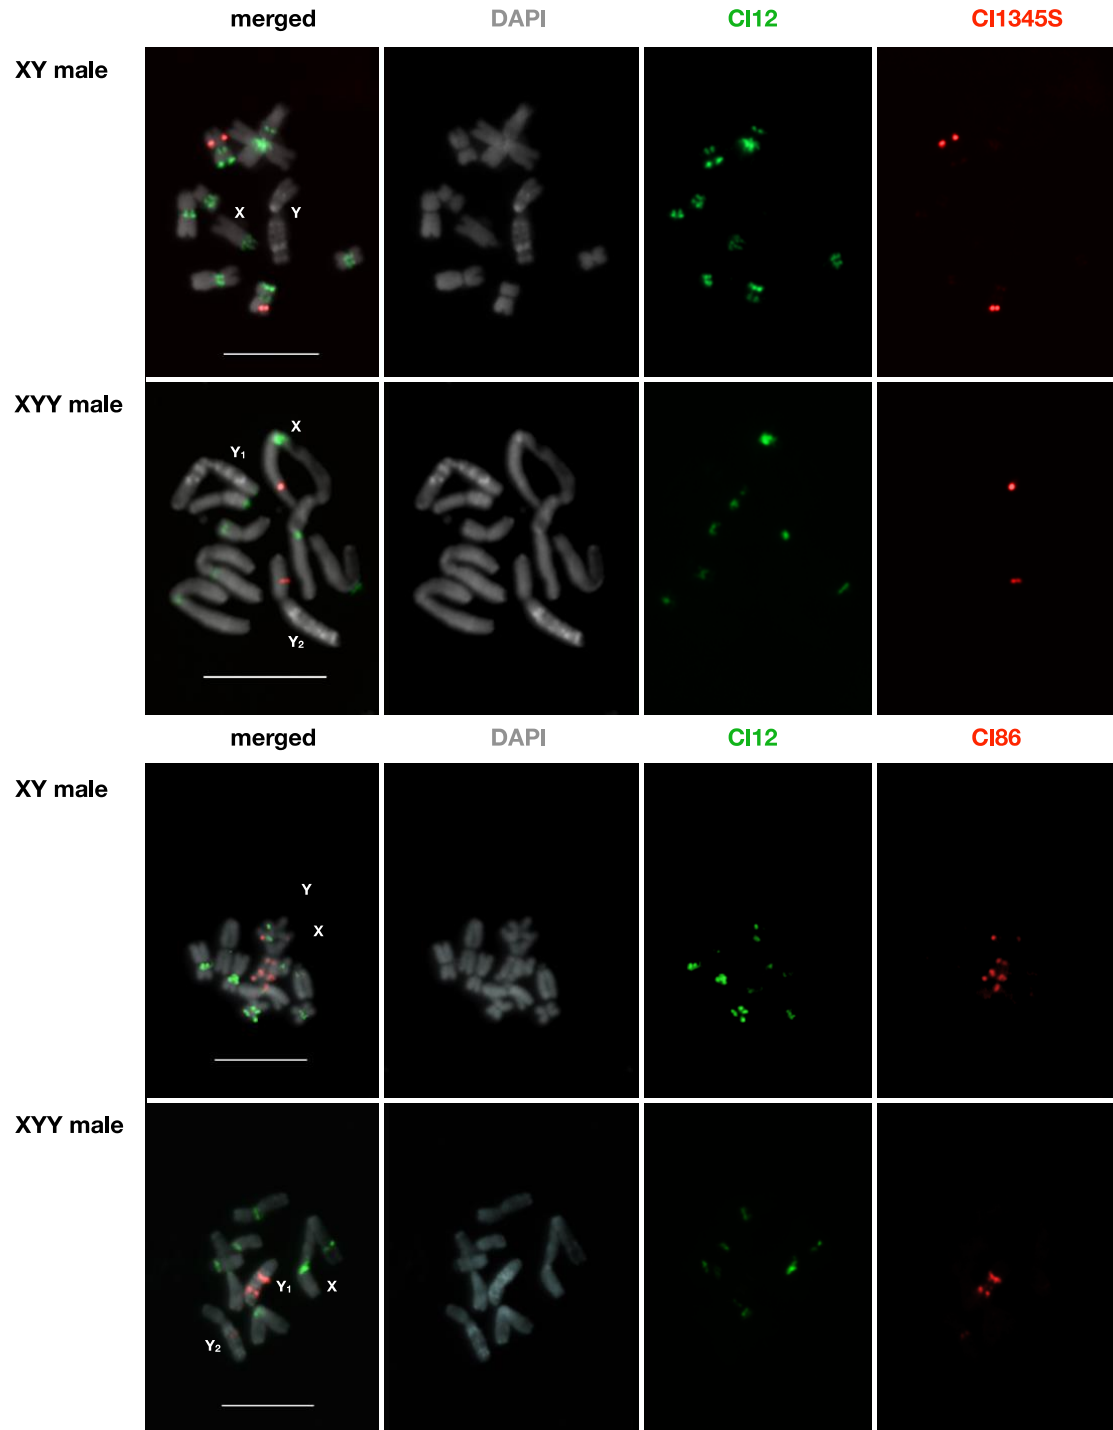

**Figure S7.** The localization of CI12 (green), CI134 5S (red-top) and CI86 (red bottom) in XY and XYY males cytotypes. Metaphase chromosomes counterstained with DAPI (grey). Scale bar = 10 mm

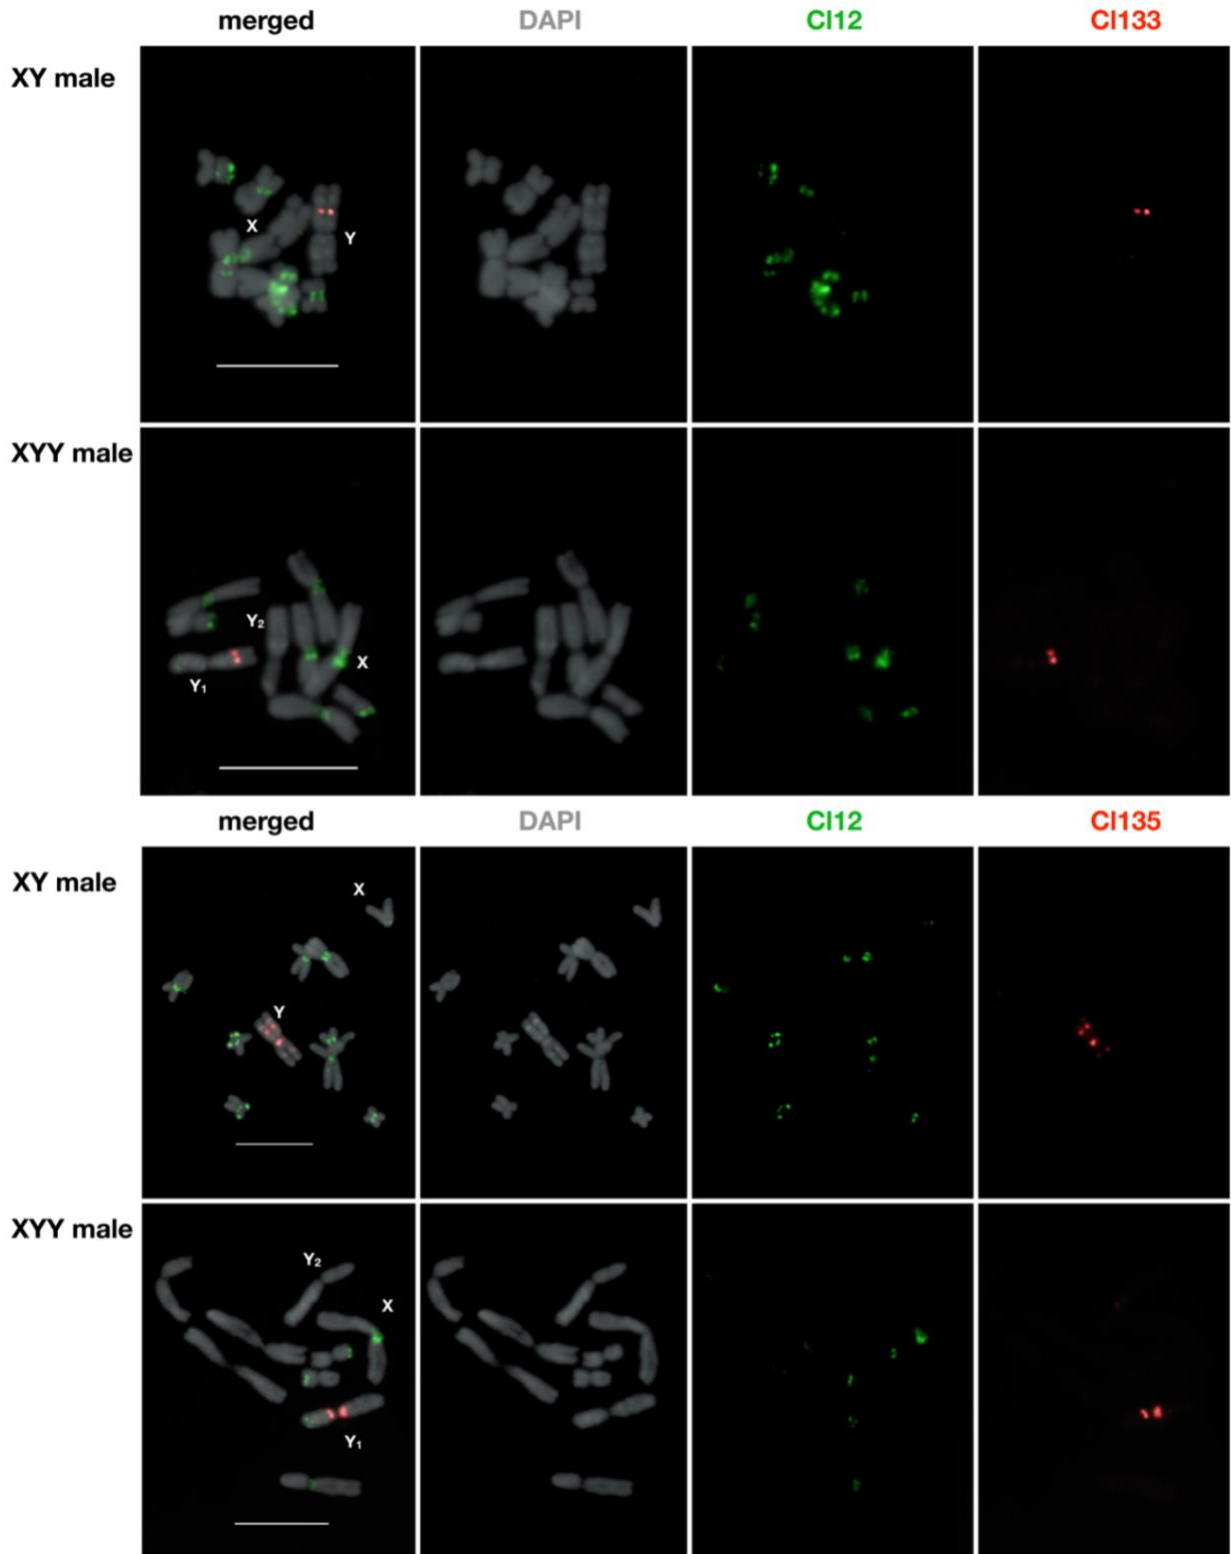

**Figure S8.** The localization of CI12, CI133 (red-top) and CI135 (red bottom) in XY and XYY males cytotypes. Metaphase chromosomes counterstained with DAPI (grey). Scale bar = 10 mm

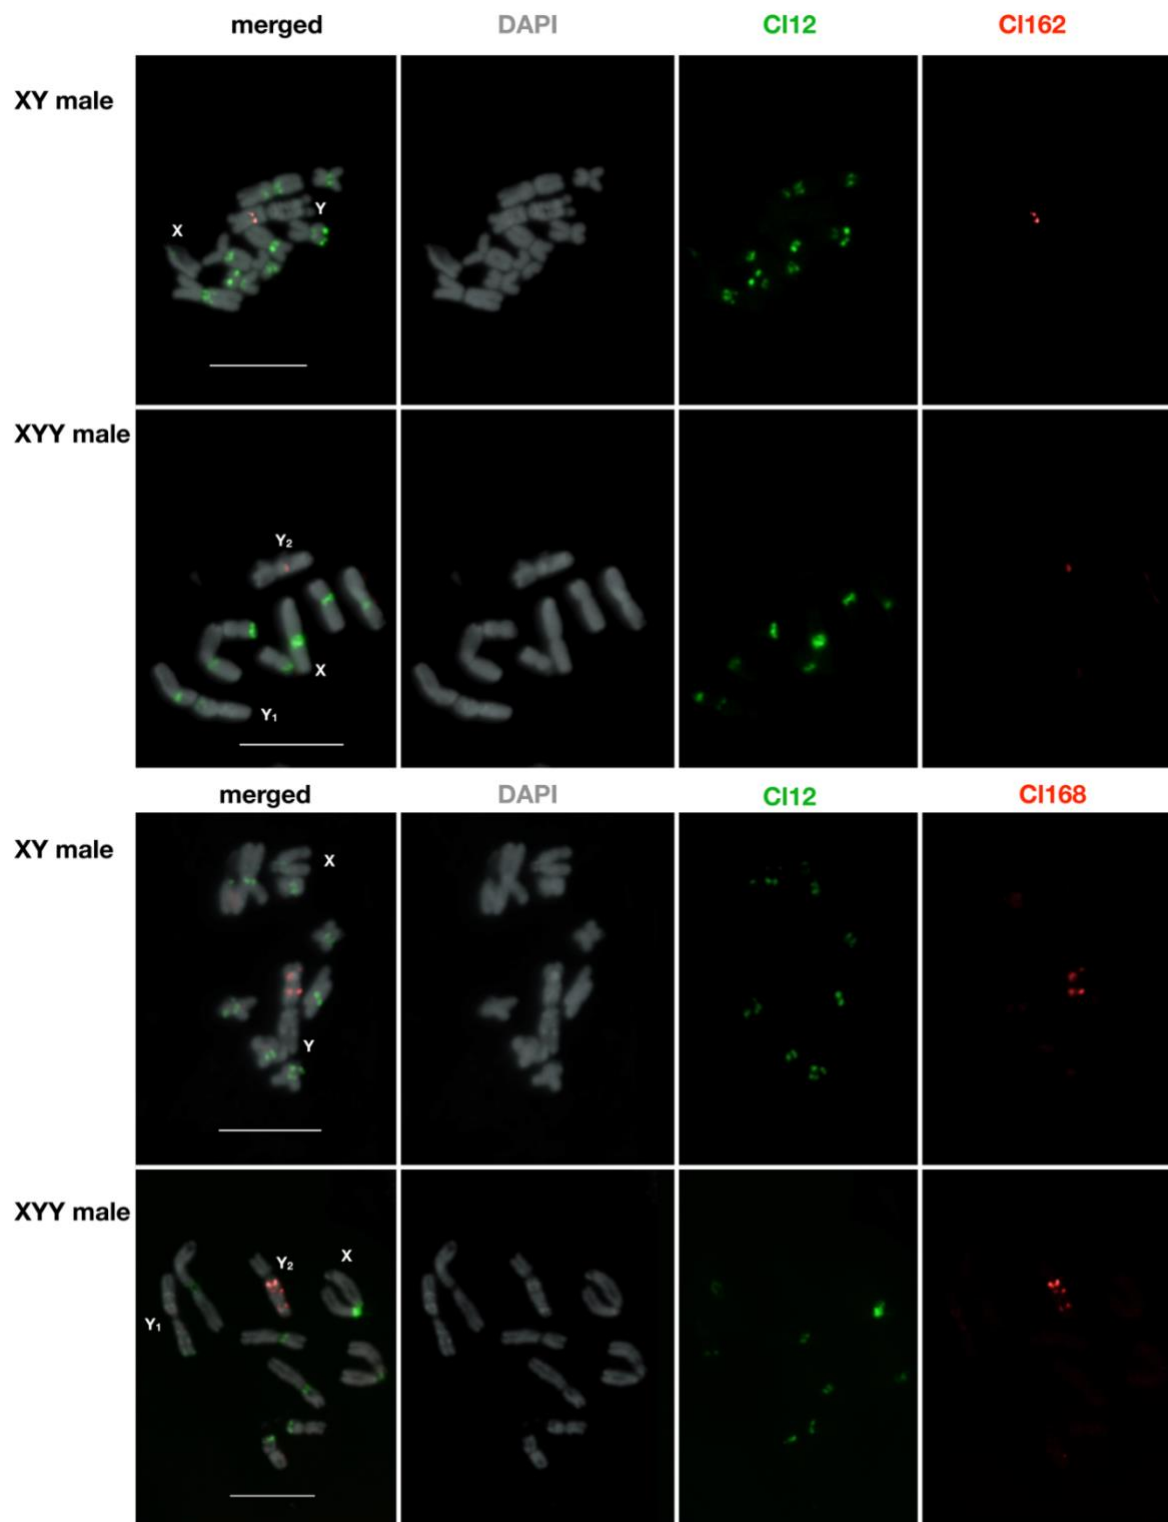

**Figure S9.** The localization of CI12, CI162 (red-top) and CI168 (red bottom) in XY and XYY male cytotypes. Metaphase chromosomes counterstained with DAPI (grey). Scale bar = 10 mm

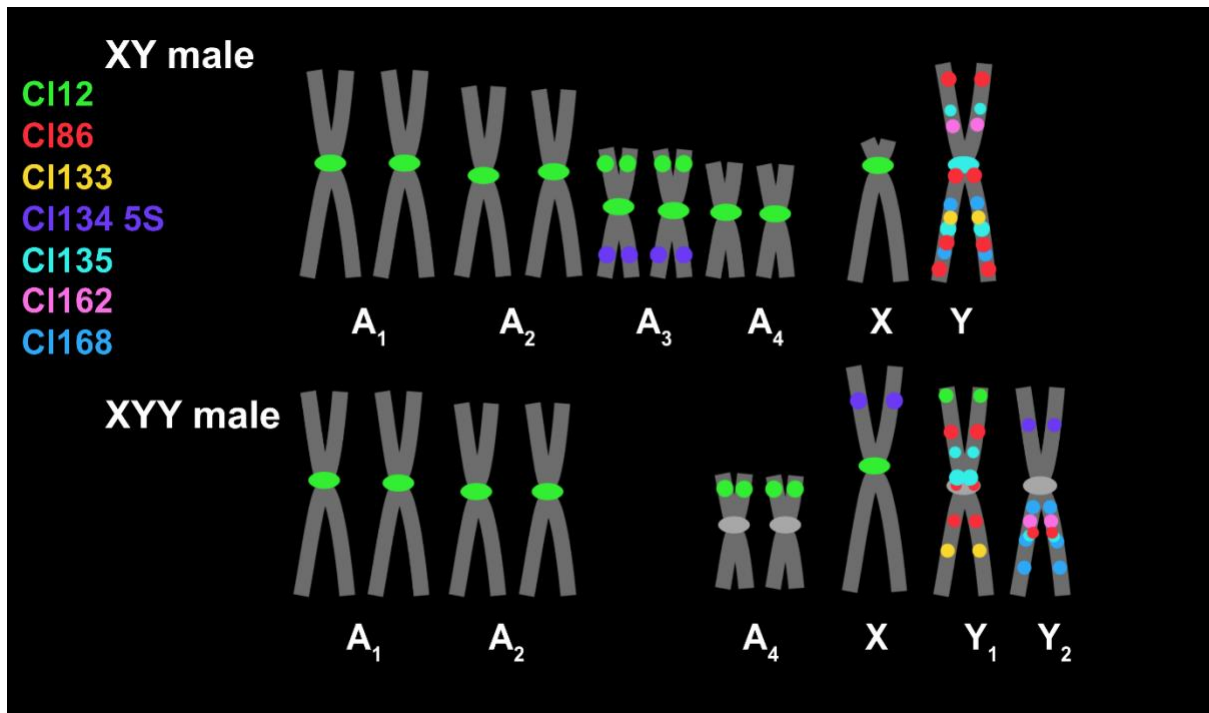

**Figure S10.** The scheme of satellite distribution in the XY and XYY male cytotypes of *Rumex hastatulus*. The satellite position along the chromosomal axis length is determined by ImageJ RGB plot diagram function, and its approximate order is shown above. Note different position of CI12 between A4 in XY cytotype Texas and A4 in XYY cytotype North Carolina, confirming an autosomal inversion on this chromosomal pair.

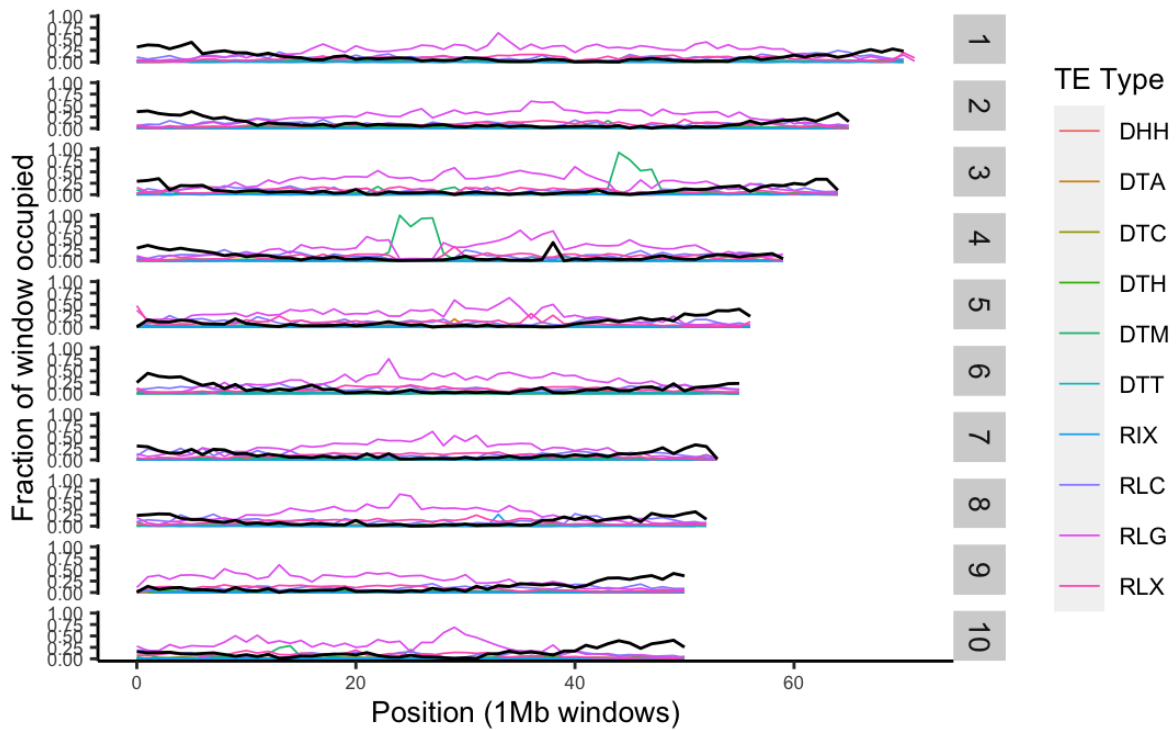

**Figure S11:** Proportion of 1 Mb non-overlapping windows across *Rumex salicifolius* chromosomes occupied by genes and TE sequences. Black lines are the fraction of the window that is genic sequence and coloured lines are fractions of the window that is TE sequence.

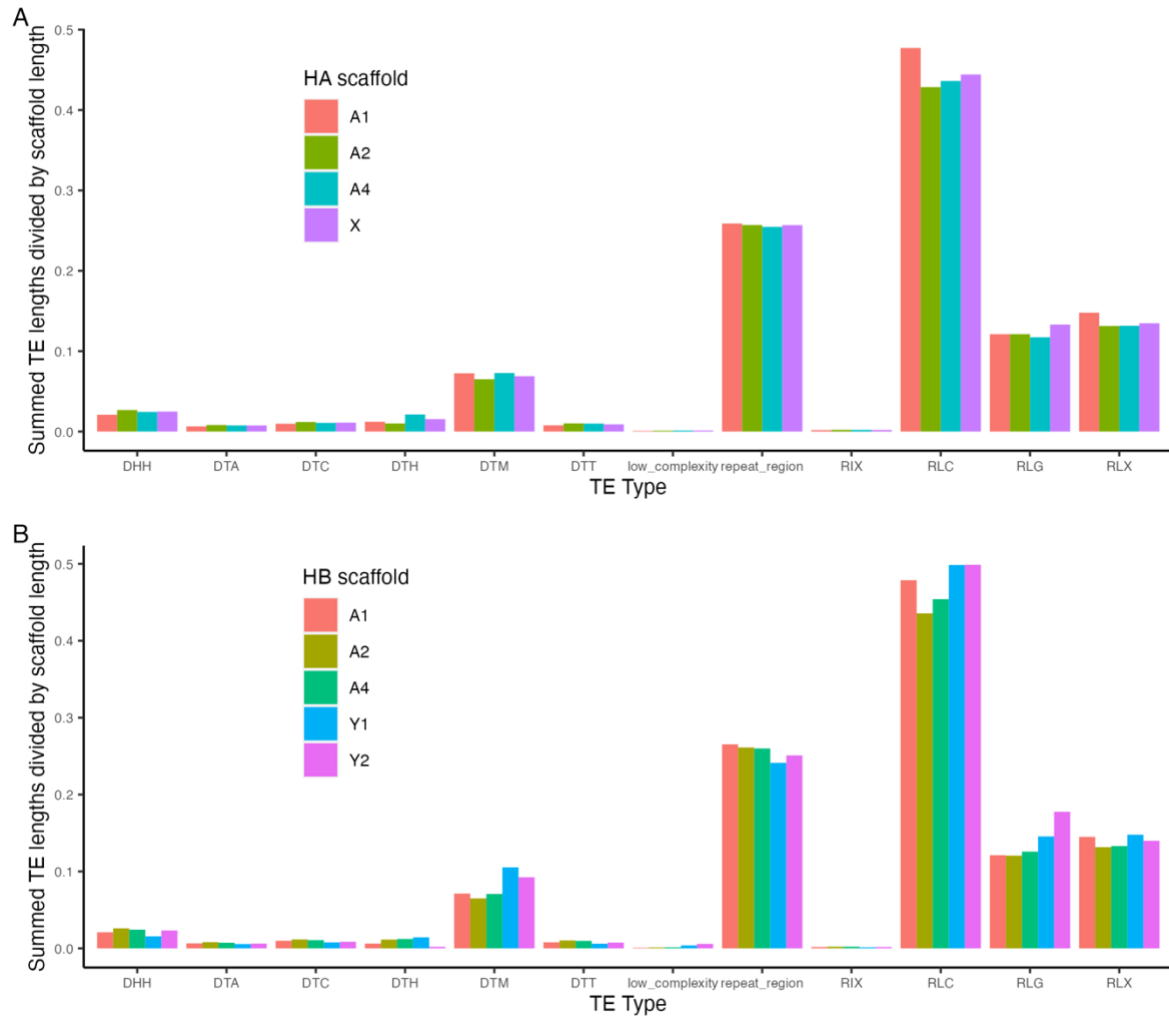

**Figure S12:** Proportion of *Rumex hastatulus* chromosomes occupied by TE sequence, separated by TE type. **A:** TE proportions for the X-bearing A haplotype. **B:** TE proportions for the Y-bearing B haplotype.



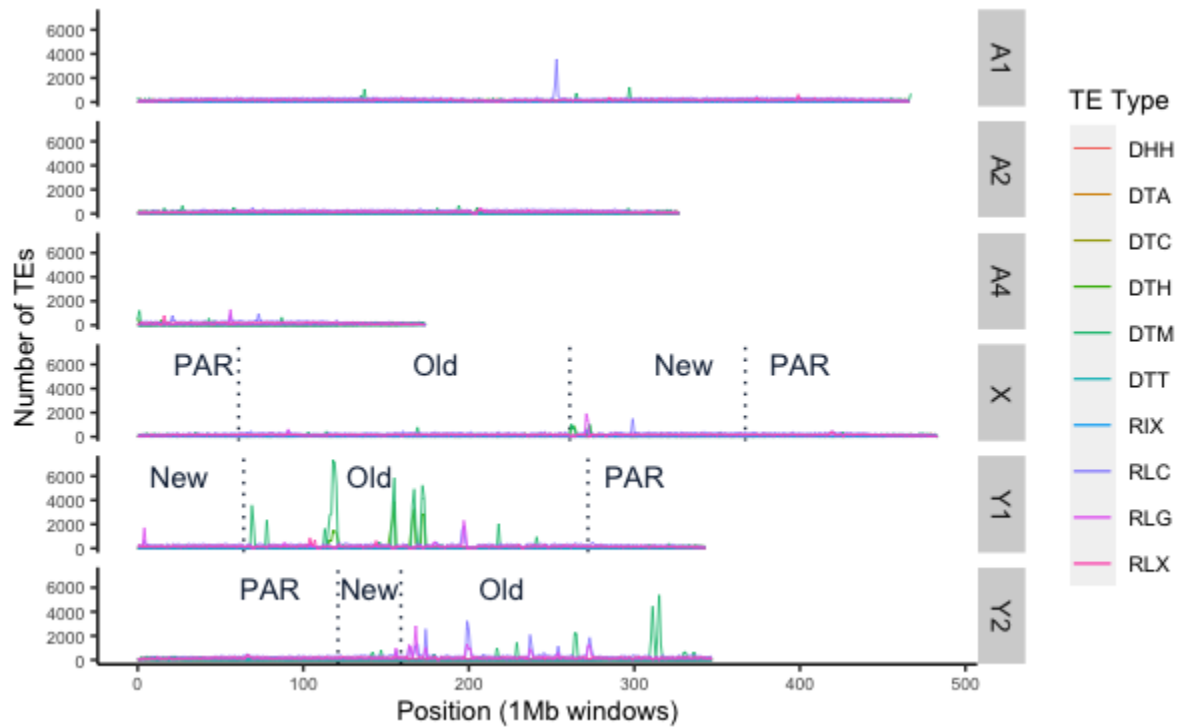

**Figure S13.** Chromosomal landscape of TE counts in *Rumex hastatulus*. The Y axis reflects the number of TEs for each 1Mb window, coloured by TE type.

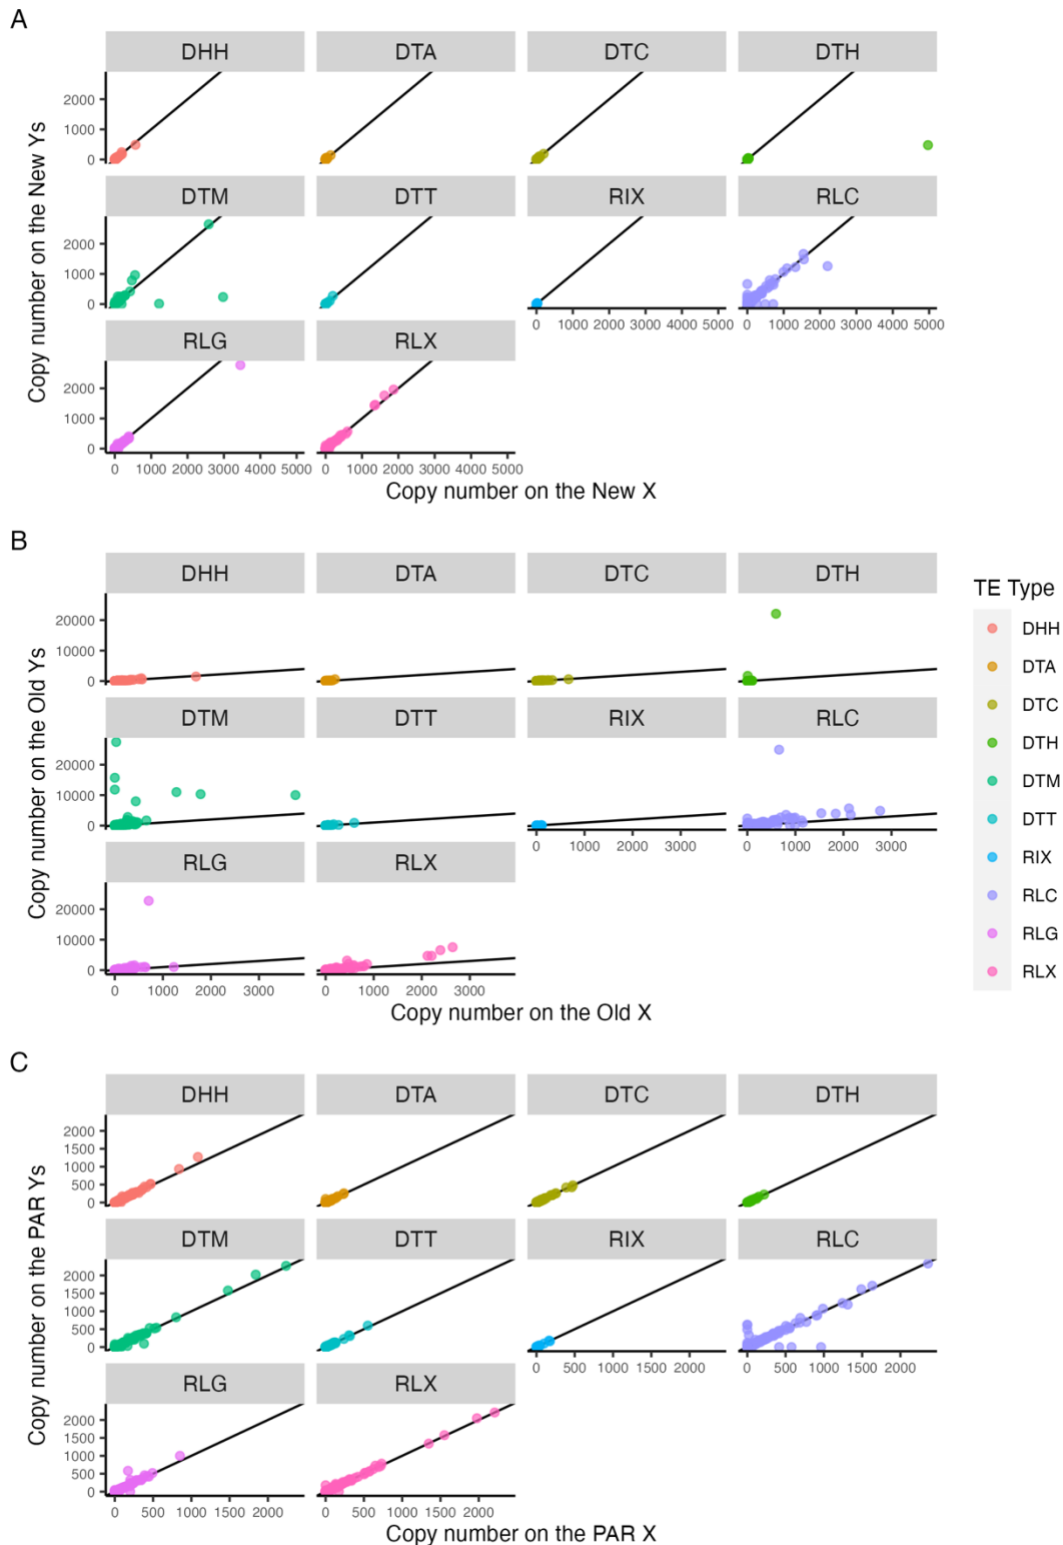

**Figure S14.** TE family copy number by TE Type. **A:** Comparison of TE copy number on the new sex-linked regions. **B:** Comparison of TE copy number on the old sex-linked regions. **C:** Comparison of TE copy number on the pseudo-autosomal regions (PARs). The three-letter transposon codes in the legend are from Wicker et al. 2007. DHH: helitron, DTA: hAT, DTC: CACTA, DTH: Harbinger, DTM: Mutator, DTT: Tc1-Mariner, RIX: unknown LINE (long

interspersed nuclear element), RLC: Copia, RLG: Ty3, RLX: unknown LTR (long terminal repeat)
